# Supplementary material for: Rainfall patterns influence poverty levels throughout Sub-Saharan Africa
Source: Research Square preprint supplement (doi:10.21203/rs.3.rs-4917281/v1), 2024-08-21
Supplement: Supplementary file 1 [file e1f11b456e6e7ed8b7d908c0.pdf]

# 1 Rainfall patterns influence poverty lev- 2 els throughout Sub-Saharan Africa

3 Xingang Li<sup>1</sup>, Ying Qu<sup>1</sup>, Ashok K. Mishra<sup>2</sup>, Xin Yao<sup>1</sup>, Liqiang Zhang<sup>1</sup>, Qiao  
4 Wang<sup>1</sup>, Yang Li<sup>1</sup>, Siyuan Chen<sup>1</sup>, Lanpu Zhao<sup>3</sup>, Zhaocong Wu<sup>3</sup>, Lei  
5 Liang<sup>1</sup>, Zidong Zhu<sup>1</sup> and Liangpei Zhang<sup>3</sup>

6 <sup>1</sup>Faculty of Geographical Science, Beijing Normal University, Beijing, 100875, China.

7 <sup>2</sup>Zachry Department of Civil & Environmental Engineering, Texas A&M University, TX,  
8 USA.

9 <sup>3</sup>Aerospace Information Research Institute, Henan Academy of Sciences, Zhengzhou, China.

**The File Includes:**

**1 Supplementary Figures (Figs. 1-11)**

**2 Supplementary Tables (Tables 1-19)**

## 13 1 Supplementary Figures

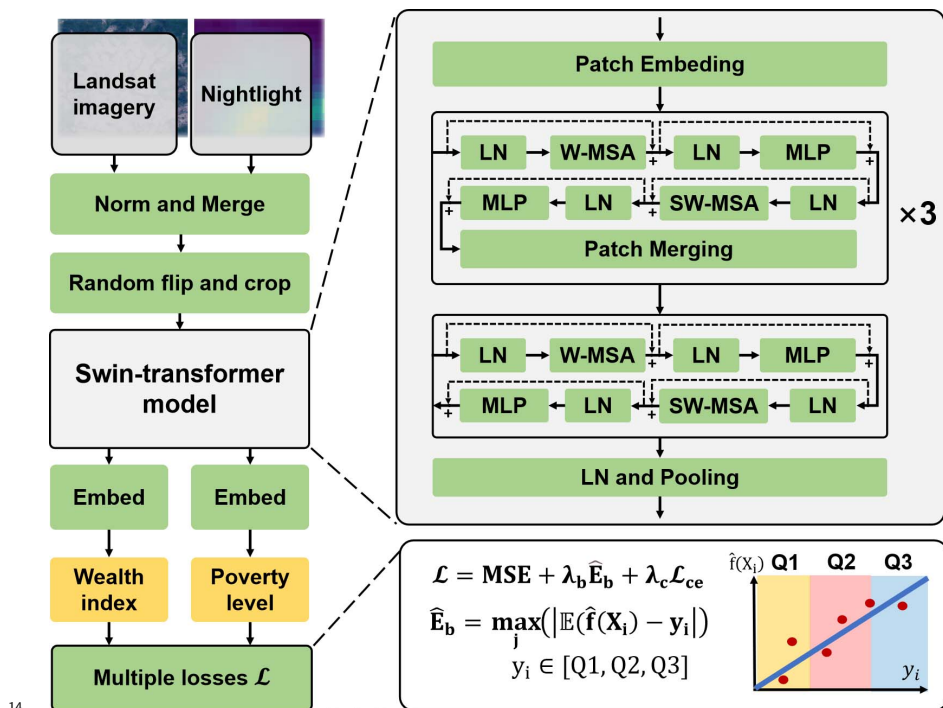

14

15 **Supplementary Fig. 1** The abstract diagram of the deep learning-based framework.

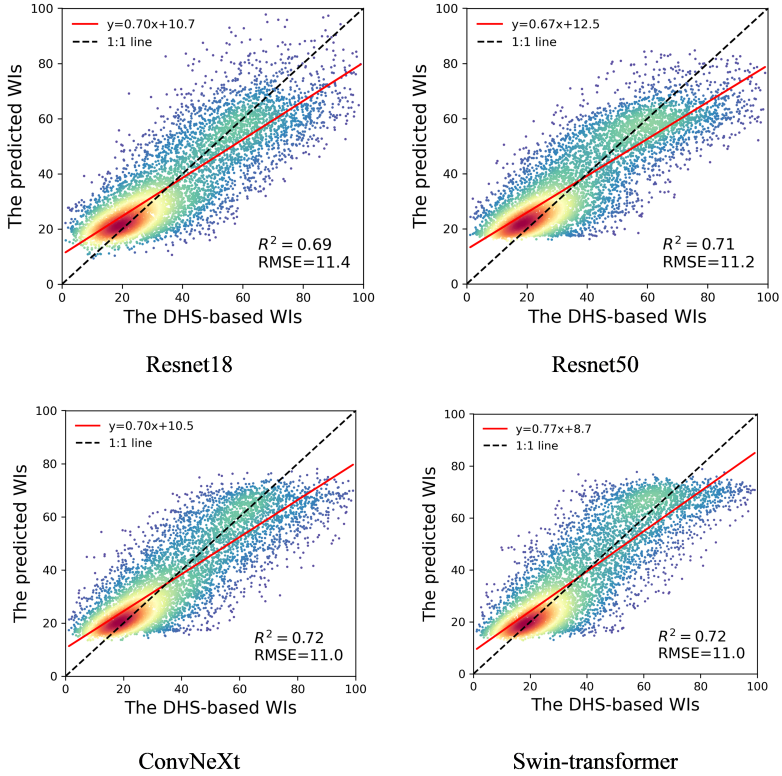

16

17 **Supplementary Fig. 2** The results of the different end-to-end deep learning frameworks  
 18 in predicting the IWIs at the community-level in SSA countries from 2010-2022.

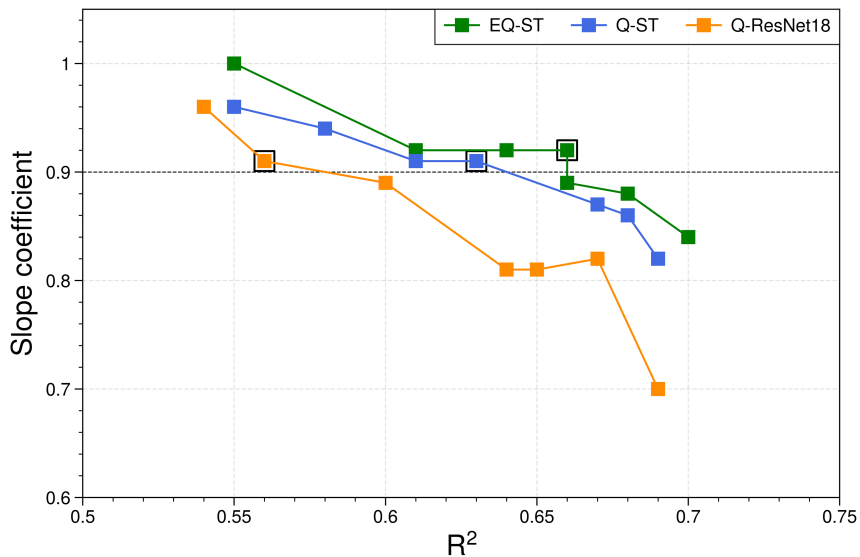

(a)

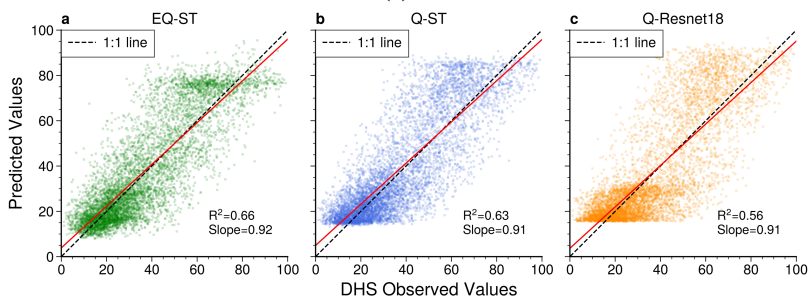

(b)

19

20 **Supplementary Fig. 3** The performance of the three models for estimating IWIs. (a)  
 21 Relationship between the slope coefficient and  $R^2$  for each subplot; (b) DHS observed wealth  
 22 index values in test set on the horizontal axis and models predicted values on the vertical  
 23 axis. The black dot line is a 45° line, and the red line is the best fit from regressing predicted  
 24 on observed. Slope coefficient and the determination coefficient  $R^2$  are shown in the lower-  
 25 right corner of each subplot.

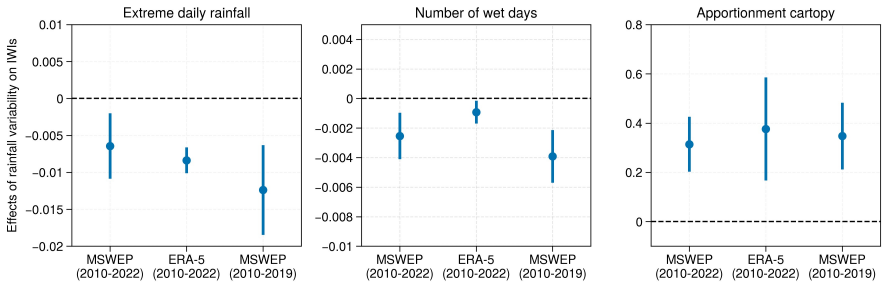

26

27 **Supplementary Fig. 4** The robustness testing of the baseline model.

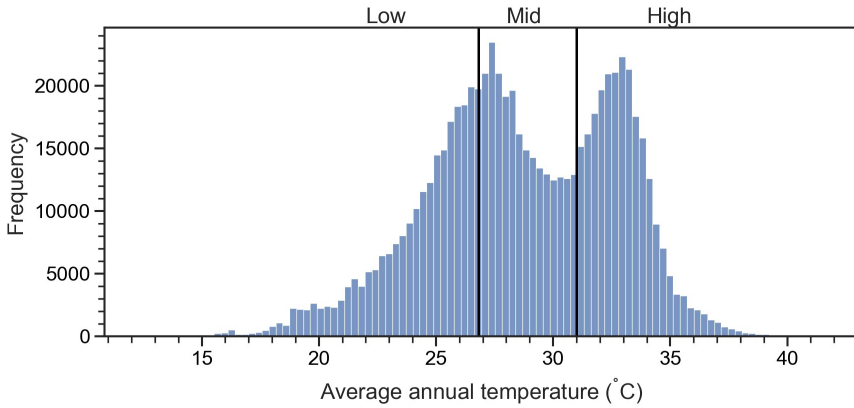

28

29 **Supplementary Fig. 5** Temperature zone divisions. Low, mid, and high temperatures  
30 represent the 0-33%, 33-66%, and 66-100% percentile intervals, respectively.

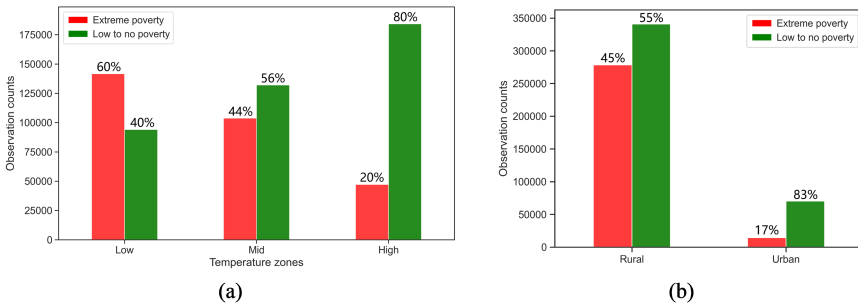

31

32 **Supplementary Fig. 6** The ratios of households in different temperature zones (a) and  
33 living environments (b).

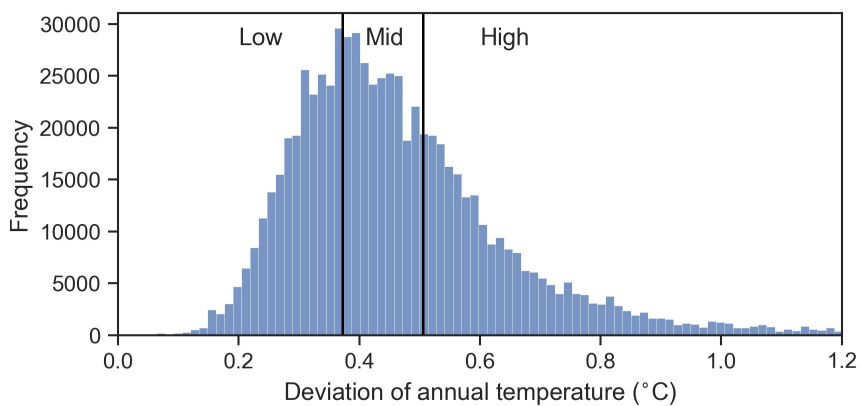

34

35 **Supplementary Fig. 7** Temperature variation zone divisions. Low, mid, and high tem-  
36 peratures represent the 0-33%, 33-66%, and 66-100% percentile intervals, respectively.

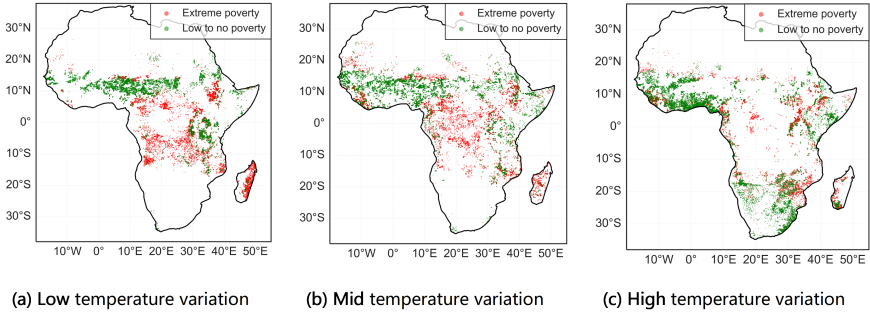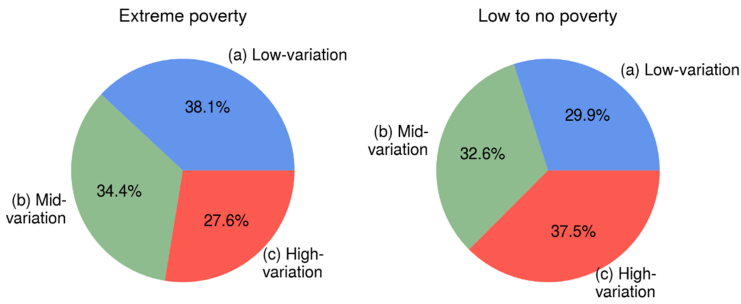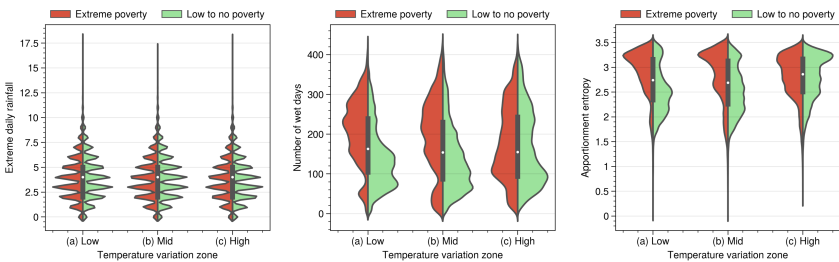

37

38 **Supplementary Fig. 8** The spatial distribution and proportions of extreme poverty and  
 39 low to no poverty households in different temperature variation zones exposed to rainfall  
 40 variability. The first row shows the spatial distribution of extreme poverty households (in  
 41 red) and low to no poverty households (in green). The pie charts illustrate the proportions of  
 42 extreme poverty households and low-poverty households across different temperature varia-  
 43 tion zones. The violin plots display the distribution of households in different poverty level  
 44 exposed to the three rainfall metrics.

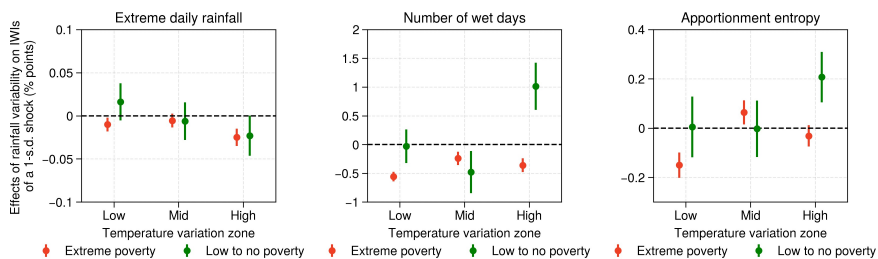

45

46 **Supplementary Fig. 9** The effect of households living in different temperature variation  
 47 zones affected by rainfall change.

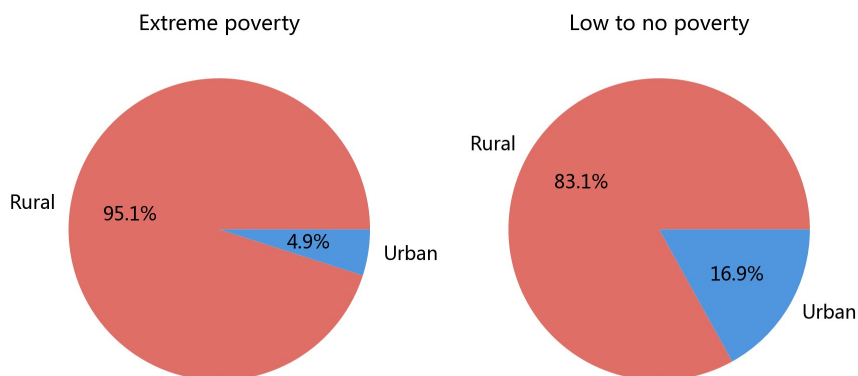

48

49 **Supplementary Fig. 10** The ratio of households experiencing extreme poverty to those  
 50 not experiencing extreme poverty (low to no poverty) across different living environments  
 51 (rural or urban).

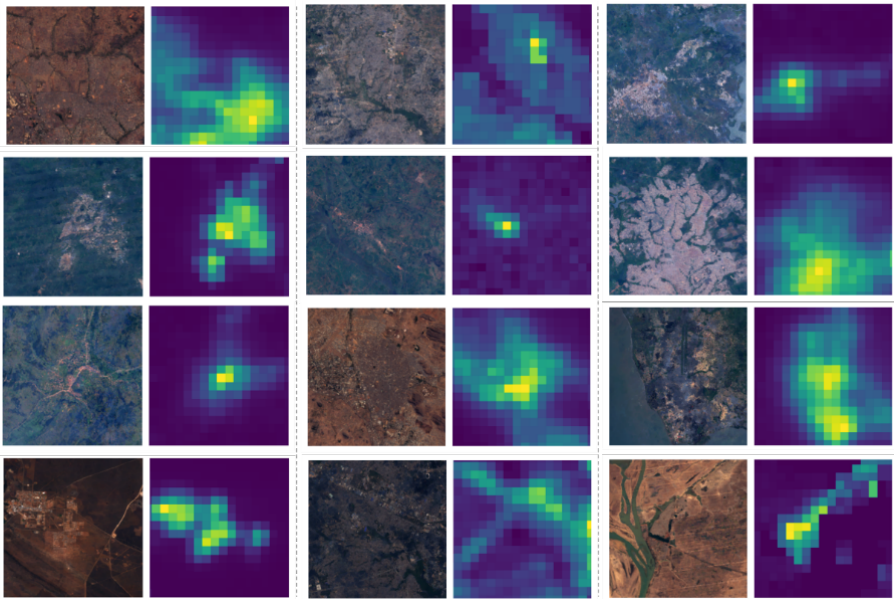

52

53

**Supplementary Fig. 11** Examples of Landsat and nighttime light data.

54 **2 Supplementary Tables****Supplementary Table 1** Comparisons of different deep learning models for estimating IWIs.

| Backbone         | $R^2$ | RMSE | Slope | Recall (<\$2.15 a day) | Recall (>\$6.85 a day) |
|------------------|-------|------|-------|------------------------|------------------------|
| Resnet-18        | 0.69  | 11.4 | 0.70  | 0.71                   | 0.55                   |
| Resnet-50        | 0.71  | 11.2 | 0.67  | 0.68                   | 0.20                   |
| ConvNeXt         | 0.72  | 11.1 | 0.70  | 0.74                   | 0.44                   |
| Swin-Transformer | 0.72  | 11.0 | 0.77  | 0.83                   | 0.49                   |

**Supplementary Table 2** Comparisons of our model with other approaches.

| Models      | $R^2$ | RMSE | Slope | Recall (<\$2.15 a day) | Recall (>\$6.85 a day) |
|-------------|-------|------|-------|------------------------|------------------------|
| Q-Resnet-18 | 0.56  | 13.7 | 0.91  | 0.80                   | 0.61                   |
| Q-ST        | 0.63  | 12.6 | 0.91  | 0.84                   | 0.41                   |
| EQ-ST       | 0.66  | 12.1 | 0.92  | 0.85                   | 0.76                   |

**Supplementary Table 3** The base model and the robust analysis.

| VARIABLES              | MSWEP                  | ERA-5                   | MSWEP                  |
|------------------------|------------------------|-------------------------|------------------------|
|                        | (base model)<br>IWI    | (2010-2022)<br>IWI      | (2010-2019)<br>IWI     |
| Extreme daily rainfall | -.00643***<br>[.00226] | -.00837***<br>[0.00090] | -.01237***<br>[.00310] |
| Number of wet days     | -.00254***<br>[.00080] | -.00093**<br>[.00039]   | -.00392***<br>[.00091] |
| Apportionment entropy  | .31410***<br>[.05688]  | .37642***<br>[.10694]   | .34775***<br>[.06907]  |
| State Fixed Effect     | YES                    | YES                     | YES                    |
| Year Fixed Effect      | YES                    | YES                     | YES                    |
| Control variables      | YES                    | YES                     | YES                    |
| Obs.                   | 708302                 | 708302                  | 505927                 |
| Adjusted R-Square      | .691                   | .691                    | .692                   |
| Within R-Square        | .057                   | .057                    | .057                   |

Robust standard errors in brackets, \*\*\*p<0.01, \*\*p<0.05, \*p<0.1

**Supplementary Table 4** Demonstrating the explanatory power of individual rainfall measures.

| VARIABLES              | Base model             | Explanatory power of individual measures |                       |                       |
|------------------------|------------------------|------------------------------------------|-----------------------|-----------------------|
|                        | IWI                    | IWI                                      | IWI                   | IWI                   |
| Extreme daily rainfall | -.00643***<br>[.00226] | -.01043***<br>[.00211]                   |                       |                       |
| Number of wet days     | -.00254***<br>[.00080] |                                          | -.00184**<br>[.00081] |                       |
| Apportionment entropy  | .31410***<br>[.05688]  |                                          |                       | .22916***<br>[.06319] |
| State Fixed Effect     | YES                    | YES                                      | YES                   | YES                   |
| Year Fixed Effect      | YES                    | YES                                      | YES                   | YES                   |
| Control variables      | YES                    | YES                                      | YES                   | YES                   |
| Obs.                   | 708302                 | 708302                                   | 708302                | 708302                |
| Adjusted R-Square      | .691                   | .691                                     | .691                  | .691                  |
| Within R-Square        | .055                   | .055                                     | .055                  | .055                  |

Robust standard errors in brackets, \*\*\*p<0.01, \*\*p<0.05, \*p<0.1

**Supplementary Table 5** The interdependence of rainfall measures.

| VARIABLES              | Base model              | Interdependence of rainfall measures |                        |                        |
|------------------------|-------------------------|--------------------------------------|------------------------|------------------------|
|                        | IWI                     | IWI                                  | IWI                    | IWI                    |
| Extreme daily rainfall | -.00643***<br>[0.00226] |                                      | -.00835***<br>[.00219] | -.00977***<br>[.00216] |
| Number of wet days     | -.00254***<br>[.00080]  | -.00259***<br>[0.00080]              |                        | -.00180**<br>[.00081]  |
| Apportionment entropy  | .31410***<br>[.05688]   | .32739***<br>[.05569]                | .21466***<br>[.06414]  |                        |
| State Fixed Effect     | YES                     | YES                                  | YES                    | YES                    |
| Year Fixed Effect      | YES                     | YES                                  | YES                    | YES                    |
| Control variables      | YES                     | YES                                  | YES                    | YES                    |
| Obs.                   | 708302                  | 708302                               | 708302                 | 708302                 |
| Adjusted R-Square      | .691                    | .691                                 | .691                   | .691                   |
| Within R-Square        | .055                    | .055                                 | .055                   | .055                   |

Robust standard errors in brackets, \*\*\*p<0.01, \*\*p<0.05, \*p<0.1

**Supplementary Table 6** The effect of rainfall variability on IWIs varies with poverty level grouping.

| VARIABLES              |                        |                       | Coefficient different |         |
|------------------------|------------------------|-----------------------|-----------------------|---------|
|                        | Extreme poverty        | Low to no poverty     | b0-b1                 | p-value |
| Extreme daily rainfall | -.00488***<br>(-3.94)  | -.00248****<br>(-.75) | -.002                 | .385    |
| Number of wet days     | -.00524***<br>(-14.86) | .00298**<br>(2.24)    | -.008                 | .000    |
| Apportionment entropy  | -.0407<br>(-1.29)      | .211***<br>(2.77]     | -.252                 | .0000   |
| State Fixed Effect     | YES                    | YES                   |                       |         |
| Year Fixed Effect      | YES                    | YES                   |                       |         |
| Control variables      | YES                    | YES                   |                       |         |
| Obs.                   | 292651                 | 415554                |                       |         |
| R-Square               | .591                   | .660                  |                       |         |

t statistics in parentheses. \*\*\*p<0.01, \*\*p<0.05, \*p<0.1.

**Supplementary Table 7** The effect of rainfall variability on IWIs of households in low temperature varies by poverty level grouping.

| VARIABLES             | Low temperature         |                       | Coefficient different |         |
|-----------------------|-------------------------|-----------------------|-----------------------|---------|
|                       | Extreme poverty         | Low to no poverty     | b0-b1                 | p-value |
|                       | Extreme daily rainfall  | -0.0108***<br>(-5.90) | -0.00577<br>(-0.75)   | -0.005  |
| Number of wet days    | -0.00679***<br>(-14.76) | 0.0132***<br>(5.66)   | -0.020                | 0.000   |
| Apportionment entropy | -0.419***<br>(-7.89)    | 0.662***<br>(3.32)    | -1.082                | 0.000   |
| State Fixed Effect    | YES                     | YES                   |                       |         |
| Year Fixed Effect     | YES                     | YES                   |                       |         |
| Control variables     | YES                     | YES                   |                       |         |
| Obs.                  | 141700                  | 94084                 |                       |         |
| R-Square              | 0.539                   | 0.734                 |                       |         |

t statistics in parentheses. \*\*\*p<0.01, \*\*p<0.05, \*p<0.1.

**Supplementary Table 8** The effect of rainfall variability on IWIs of households in mid temperature zone varies by poverty level grouping.

| VARIABLES              | Mid temperature        |                      | Coefficient |         |
|------------------------|------------------------|----------------------|-------------|---------|
|                        | Extreme poverty        | Low to no poverty    | b0-b1       | p-value |
| Extreme daily rainfall | -0.00483**<br>(-2.54)  | -0.000414<br>(-0.07) | -0.004      | 0.270   |
| Number of wet days     | -0.00364***<br>(-6.82) | 0.00910***<br>(4.18) | -0.013      | 0.000   |
| Apportionment entropy  | -0.361***<br>(-7.89)   | 0.722***<br>(4.73)   | -1.083      | 0.000   |
| State Fixed Effect     | YES                    | YES                  |             |         |
| Year Fixed Effect      | YES                    | YES                  |             |         |
| Control variables      | YES                    | YES                  |             |         |
| Obs.                   | 103711                 | 132105               |             |         |
| R-Square               | 0.643                  | 0.660                |             |         |

t statistics in parentheses. \*\*\*p<0.01, \*\*p<0.05, \*p<0.1.

**Supplementary Table 9** The effect of rainfall variability on IWIs of households in high temperature zone varies by poverty level grouping.

| VARIABLES              | High temperature      |                        | Coefficient |         |
|------------------------|-----------------------|------------------------|-------------|---------|
|                        | Extreme poverty       | Low to no poverty      | b0-b1       | p-value |
| Extreme daily rainfall | -0.0123***<br>(-3.89) | 0.0101**<br>(2.29)     | -0.022      | 0.040   |
| Number of wet days     | 0.00659***<br>(5.47)  | -0.00994***<br>(-4.53) | 0.0140      | 0.000   |
| Apportionment entropy  | 0.391***<br>(7.79)    | -0.107<br>(-1.22)      | 0.423       | 0.005   |
| State Fixed Effect     | YES                   | YES                    |             |         |
| Year Fixed Effect      | YES                   | YES                    |             |         |
| Control variables      | YES                   | YES                    |             |         |
| Obs.                   | 47172                 | 189337                 |             |         |
| R-Square               | 0.518                 | 0.523                  |             |         |

t statistics in parentheses. \*\*\*p<0.01, \*\*p<0.05, \*p<0.1.

**Supplementary Table 10** The effect of rainfall variability on IWIs of households in low temperature varies by poverty level grouping.

| VARIABLES              | Low temperature variation |                      | Coefficient |         |
|------------------------|---------------------------|----------------------|-------------|---------|
|                        | Extreme poverty           | Low to no poverty    | b0-b1       | p-value |
| Extreme daily rainfall | -0.00484**<br>(-2.48)     | 0.00750<br>(1.46)    | -0.012      | 0.040   |
| Number of wet days     | -0.00694***<br>(-13.19)   | -0.000387<br>(-0.20) | -0.007      | 0.000   |
| Apportionment entropy  | -0.342***<br>(-5.77)      | 0.0101<br>(0.08)     | -0.352      | 0.000   |
| State Fixed Effect     | YES                       | YES                  |             |         |
| Year Fixed Effect      | YES                       | YES                  |             |         |
| Control variables      | YES                       | YES                  |             |         |
| Obs.                   | 111377                    | 124442               |             |         |
| R-Square               | 0.601                     | 0.618                |             |         |

t statistics in parentheses. \*\*\*p<0.01, \*\*p<0.05, \*p<0.1.

**Supplementary Table 11** The effect of rainfall variability on IWIs of households in mid temperature variation zone varies by poverty level grouping.

| VARIABLES              | Low temperature variation |                      | Coefficient |         |
|------------------------|---------------------------|----------------------|-------------|---------|
|                        | Extreme poverty           | Low to no poverty    | b0-b1       | p-value |
| Extreme daily rainfall | -0.00484**<br>(-2.48)     | 0.00750<br>(1.46)    | -0.012      | 0.040   |
| Number of wet days     | -0.00694***<br>(-13.19)   | -0.000387<br>(-0.20) | -0.007      | 0.000   |
| Apportionment entropy  | -0.342***<br>(-5.77)      | 0.0101<br>(0.08)     | -0.352      | 0.000   |
| State Fixed Effect     | YES                       | YES                  |             |         |
| Year Fixed Effect      | YES                       | YES                  |             |         |
| Control variables      | YES                       | YES                  |             |         |
| Obs.                   | 111377                    | 124442               |             |         |
| R-Square               | 0.601                     | 0.618                |             |         |

t statistics in parentheses. \*\*\*p<0.01, \*\*p<0.05, \*p<0.1.

**Supplementary Table 12** The effect of rainfall variability on households in high temperature variation zone varies by poverty level grouping.

| VARIABLES              | High temperature variation |                      | Coefficient different |         |
|------------------------|----------------------------|----------------------|-----------------------|---------|
|                        | Extreme poverty            | Low to no poverty    | b0-b1                 | p-value |
| Extreme daily rainfall | -0.0120***<br>(-4.90)      | -0.0111**<br>(-1.94) | -0.001                | 0.475   |
| Number of wet days     | -0.00394***<br>(5.94)      | 0.0109***<br>(4.85)  | -0.015                | 0.000   |
| Apportionment entropy  | -0.0699<br>(-1.44)         | 0.463***<br>(3.98)   | -0.533                | 0.000   |
| State Fixed Effect     | YES                        | YES                  |                       |         |
| Year Fixed Effect      | YES                        | YES                  |                       |         |
| Control variables      | YES                        | YES                  |                       |         |
| Obs.                   | 80684                      | 155781               |                       |         |
| R-Square               | 0.530                      | 0.713                |                       |         |

t statistics in parentheses. \*\*\*p<0.01, \*\*p<0.05, \*p<0.1.

**Supplementary Table 13** The effect of rainfall variability on Rural households' IWIs varies by poverty level grouping.

| VARIABLES              | Rural                   |                       | Coefficient different |         |
|------------------------|-------------------------|-----------------------|-----------------------|---------|
|                        | Extreme poverty         | Low to no poverty     | b0-b1                 | p-value |
| Extreme daily rainfall | -0.00351***<br>(-2.83)  | -0.00657**<br>(-2.35) | .003                  | .190    |
| Number of wet days     | -0.00540***<br>(-14.80) | .00209*<br>(1.75)     | -0.007                | .000    |
| Apportionment entropy  | -.0240<br>(-.75)        | .129**<br>(2.05)      | -0.153                | .000    |
| State Fixed Effect     | YES                     | YES                   |                       |         |
| Year Fixed Effect      | YES                     | YES                   |                       |         |
| Control variables      | YES                     | YES                   |                       |         |
| Obs.                   | 278220                  | 345141                |                       |         |
| R-Square               | .606                    | .551                  |                       |         |

t statistics in parentheses. \*\*\*p<0.01, \*\*p<0.05, \*p<0.1.

**Supplementary Table 14** The effect of rainfall variability on Urban households' IWIs varies by poverty level grouping.

| VARIABLES              |                          |                     | Coefficient different |         |
|------------------------|--------------------------|---------------------|-----------------------|---------|
|                        | Urban<br>Extreme poverty | Low to no poverty   | b0-b1                 | p-value |
| Extreme daily rainfall | -0.0153**<br>(-2.35)     | 0.0228***<br>(3.66) | -0.038                | 0.090   |
| Number of wet days     | -0.00326**<br>(-2.26)    | -0.00135<br>(-0.46) | -0.002                | 0.260   |
| Apportionment entropy  | -0.0653<br>(-0.43)       | 0.159<br>(0.80)     | -0.224                | 0.315   |
| State Fixed Effect     | YES                      | YES                 |                       |         |
| Year Fixed Effect      | YES                      | YES                 |                       |         |
| Control variables      | YES                      | YES                 |                       |         |
| Obs.                   | 14397                    | 70396               |                       |         |
| R-Square               | .496                     | .872                |                       |         |

t statistics in parentheses. \*\*\*p<0.01, \*\*p<0.05, \*p<0.1.

**Supplementary Table 15** The year and month of the DHS survey.

| Country                   | 2010 | 2011 | 2012 | 2013 | 2014 | 2015 | 2016 | 2017 | 2018 | 2019 | 2020 | 2021 |
|---------------------------|------|------|------|------|------|------|------|------|------|------|------|------|
| Angola                    |      | 3    |      |      |      | 12   |      |      |      |      |      |      |
| Benin                     |      |      | 1    |      |      |      |      | 12   |      |      |      |      |
| Burkina Faso              | 8    |      |      |      | 9    |      |      |      | 1    |      |      |      |
| Burundi                   | 10   |      | 12   |      |      |      | 12   |      |      |      |      |      |
| Cameroon                  |      | 4    |      |      |      |      |      |      | 9    |      |      |      |
| Chad                      |      |      |      |      |      | 1    |      |      |      |      |      |      |
| Comoros                   |      |      | 10   |      |      |      |      |      |      |      |      |      |
| Congo Democratic Republic |      |      |      | 10   |      |      |      |      |      |      |      |      |
| Ethiopia                  |      | 2    |      |      |      |      | 3    |      |      | 4    |      |      |
| Gabon                     |      |      | 3    |      |      |      |      |      |      |      |      |      |
| Gambia                    |      |      |      |      |      |      |      |      |      |      |      | 1    |
| Ghana                     |      |      |      |      | 10   |      | 11   | 8    |      | 10   |      |      |
| Guinea                    |      |      | 8    |      |      |      |      |      | 4    |      |      | 8    |
| Kenya                     |      |      |      |      | 7    | 7    |      |      |      |      | 11   |      |
| Lesotho                   |      |      |      |      | 10   |      |      |      |      |      |      |      |
| Liberia                   |      | 10   |      | 5    |      |      | 10   |      |      | 12   |      |      |
| Madagascar                |      | 4    |      | 5    |      |      | 6    |      |      |      |      | 5    |
| Malawi                    | 8    |      | 4    |      | 5    | 12   |      | 4    |      |      |      |      |
| Mali                      | 9    |      | 12   |      |      | 10   |      |      | 9    |      |      | 10   |
| Mozambique                |      | 8    |      |      |      | 7    |      |      | 5    |      |      |      |
| Namibia                   |      |      |      | 7    |      |      |      |      |      |      |      |      |
| Niger                     |      |      | 4    |      |      |      |      |      |      |      |      | 9    |
| Nigeria                   | 11   |      |      | 4    |      | 10   |      |      | 10   |      |      | 11   |
| Rwanda                    |      | 1    |      |      |      | 1    |      |      |      |      | 3    |      |
| Senegal                   | 12   |      |      | 2    | 5    | 5    | 5    | 8    | 9    | 8    | 12   |      |
| Sierra Leone              |      |      |      | 8    |      |      | 7    |      |      | 6    |      |      |
| South Africa              |      |      |      |      |      |      | 8    |      |      |      |      |      |
| Tanzania                  | 2    |      | 2    |      |      | 11   |      | 11   |      |      |      |      |
| Togo                      |      |      |      |      | 1    |      |      | 10   |      |      |      |      |
| Uganda                    |      | 9    |      |      | 12   |      | 9    |      |      | 1    |      |      |
| Zambia                    |      |      |      | 12   |      |      |      |      | 10   |      |      |      |
| Zimbabwe                  | 12   |      |      |      |      | 9    |      |      |      |      |      |      |

**Supplementary Table 16** Description of three poverty levels.

| Quantile    | Q1: Extreme poverty                 | Q2: Low poverty                                             | Q3: No poverty                      |
|-------------|-------------------------------------|-------------------------------------------------------------|-------------------------------------|
| Description | Less than \$2.15 per person per day | Less than \$6.85 and greater than \$2.15 per person per day | More than \$6.85 per person per day |
| Proportion  | $0 \leq y < 36.40\%$                | $36.40\% \leq y < 87\%$                                     | $y \geq 87\%$                       |
| Value       | $0 \leq y < 24.1$                   | $24.1 \leq y < 62.8$                                        | $y \geq 62.8$                       |

**Supplementary Table 17** The prediction performance comparison of Enhanced-Quantile loss function based Swin Transformer (EQ-ST), Quintile loss function based ResNet18 (Q-ResNet18) and Quintile loss function based Swin Transformer (Q-ST).

|   | EQ-ST |       | Q-ResNet18 |       | Q-ST  |       |
|---|-------|-------|------------|-------|-------|-------|
|   | $R^2$ | Slope | $R^2$      | Slope | $R^2$ | Slope |
| 1 | 0.70  | 0.84  | 0.67       | 0.82  | 0.69  | 0.82  |
| 2 | 0.68  | 0.88  | 0.64       | 0.81  | 0.68  | 0.86  |
| 3 | 0.67  | 0.89  | 0.60       | 0.89  | 0.67  | 0.87  |
| 4 | 0.66  | 0.92  | 0.65       | 0.81  | 0.65  | 0.89  |
| 5 | 0.64  | 0.92  | 0.56       | 0.91  | 0.63  | 0.91  |
| 6 | 0.63  | 0.92  | 0.56       | 0.92  | 0.61  | 0.92  |
| 7 | 0.55  | 1.00  | 0.54       | 0.96  | 0.58  | 0.94  |

**Supplementary Table 18** The prediction performance in leave-one-country-out cross validation.

| Name    | Counts | $R^2$ | RMSE  | Slope |
|---------|--------|-------|-------|-------|
| AGO     | 826    | 0.79  | 14.25 | 0.99  |
| BDI     | 1119   | 0.61  | 9.59  | 0.82  |
| BEN     | 1277   | 0.62  | 14.15 | 0.96  |
| BFA     | 996    | 0.66  | 11.32 | 1.14  |
| CMR     | 993    | 0.66  | 13.77 | 0.96  |
| COD     | 489    | 0.83  | 8.52  | 1.10  |
| COM     | 225    | 0.44  | 17.59 | 0.69  |
| ETH     | 1487   | 0.79  | 12.75 | 0.88  |
| GAB     | 324    | 0.72  | 13.95 | 0.79  |
| GHA     | 806    | 0.63  | 11.41 | 0.98  |
| GIN     | 865    | 0.79  | 10.20 | 0.93  |
| GMB     | 262    | 0.78  | 13.73 | 0.83  |
| KEN     | 2106   | 0.59  | 12.36 | 0.84  |
| LBR     | 939    | 0.66  | 10.49 | 0.97  |
| LSO     | 397    | 0.62  | 14.31 | 1.18  |
| MDG     | 1433   | 0.62  | 11.05 | 0.94  |
| MLI     | 1132   | 0.74  | 12.19 | 1.23  |
| MOZ     | 1124   | 0.77  | 14.43 | 1.11  |
| MWI     | 267    | 0.66  | 15.66 | 1.16  |
| NAM     | 446    | 0.62  | 16.40 | 0.75  |
| NER     | 465    | 0.71  | 13.67 | 0.87  |
| NGA     | 3120   | 0.44  | 15.08 | 0.69  |
| RWA     | 1477   | 0.66  | 10.09 | 0.97  |
| SEN     | 1939   | 0.64  | 14.30 | 0.74  |
| SLE     | 990    | 0.77  | 9.44  | 1.04  |
| TCD     | 620    | 0.67  | 10.62 | 1.04  |
| TGO     | 500    | 0.73  | 11.37 | 1.13  |
| TZA     | 2062   | 0.66  | 11.96 | 1.00  |
| UGA     | 1421   | 0.60  | 11.58 | 1.01  |
| ZAF     | 626    | 0.44  | 17.30 | 0.59  |
| ZMB     | 1224   | 0.69  | 13.82 | 0.95  |
| ZWE     | 771    | 0.77  | 14.55 | 0.94  |
| Average | 1023   | 0.67  | 12.87 | 0.94  |

**Supplementary Table 19** The prediction performance when the test set is in a specific year.

|         | $R^2$ (EQ-ST) | $R^2$ (Q-ST) | $R^2$ (Q-ResNet18) | Slope(EQ-ST) | Slope(Q-ST) | Slope(Q-ResNet18) |
|---------|---------------|--------------|--------------------|--------------|-------------|-------------------|
| 2010    | 0.67          | 0.67         | 0.62               | 1.00         | 0.87        | 0.89              |
| 2011    | 0.55          | 0.53         | 0.45               | 0.96         | 0.95        | 1.02              |
| 2012    | 0.56          | 0.48         | 0.37               | 0.92         | 0.81        | 0.81              |
| 2013    | 0.69          | 0.47         | 0.62               | 0.91         | 0.94        | 0.92              |
| 2014    | 0.57          | 0.66         | 0.41               | 0.90         | 0.92        | 0.93              |
| 2015    | 0.58          | 0.52         | 0.41               | 0.97         | 0.99        | 1.02              |
| 2016    | 0.80          | 0.79         | 0.76               | 0.85         | 0.89        | 0.92              |
| 2017    | 0.60          | 0.58         | 0.57               | 0.90         | 0.88        | 0.92              |
| 2018    | 0.60          | 0.56         | 0.45               | 0.93         | 0.94        | 0.92              |
| 2019    | 0.68          | 0.66         | 0.57               | 0.94         | 0.85        | 0.78              |
| 2020    | 0.54          | 0.52         | 0.50               | 0.83         | 0.81        | 0.87              |
| 2021    | 0.63          | 0.66         | 0.62               | 0.86         | 0.87        | 0.85              |
| Average | 0.62          | 0.59         | 0.53               | 0.91         | 0.89        | 0.90              |
